# Nonhalogenated Alkanes Cyclopropane and Butane Affect Neurotransmitter-gated Ion Channel and G-protein-coupled Receptors

## Differential Actions on GABA<sub>A</sub> and Glycine Receptors

Koji Hara, M.D., Ph.D.,\* Edmond I. Eger II, M.D.,† Michael J. Laster, D.V.M.,‡ R. Adron Harris, Ph.D.§

**Background:** Anesthetic mechanisms of nonhalogenated alkanes cyclopropane and butane are not understood. This study was designed to look at which neurotransmitter receptors are possible targets for these anesthetics.

**Methods:** Effects of cyclopropane and butane on eight recombinant receptors expressed in *Xenopus* oocytes were examined electrophysiologically. To address molecular mechanisms of interaction with glycine and  $\gamma$ -aminobutyric acid type A (GABA<sub>A</sub>) receptors, cyclopropane was further tested on  $\alpha_1$ (S267C) glycine receptor and  $\alpha_2$ (S270X) $\beta_1$  GABA<sub>A</sub> receptors that were mutated to amino acids with larger side chains.

**Results:** Cyclopropane (1, 2, and 5 minimum alveolar concentration [MAC]) potentiated glycine responses by 39, 62, and 161%, respectively, and butane (1 MAC) potentiated by 64% with an increase in apparent affinity for glycine, but yielded barely detectable potentiation of GABA<sub>A</sub> receptors. The efficacy of cyclopropane for glycine receptors was less than isoflurane and halothane. The potentiation by cyclopropane was eliminated for the  $\alpha_1$ (S267C) glycine receptor. Mutant GABA<sub>A</sub> receptors in which the corresponding amino acid was substituted with larger amino acids did not produce significant potentiation. Cyclopropane and butane inhibited nicotinic acetylcholine and *N*-methyl-D-aspartate receptors, potentiated G-protein-coupled inwardly rectifying potassium channels, and did not change 5-hydroxytryptamine<sub>3A</sub> or muscarinic<sub>1</sub> receptor function. Only cyclopropane markedly inhibited  $\alpha$ -amino-3-hydroxy-5-methyl-4-isoxazole propionic acid receptors.

**Conclusions:** Glycine, nicotinic acetylcholine, and *N*-methyl-D-aspartate receptors are sensitive to nonhalogenated alkanes, and the authors propose that glycine and *N*-methyl-D-aspartate receptors are good candidates for anesthetic immobility. The authors also suggest that the distinct effects on glycine and GABA<sub>A</sub> receptors are not due to the small volumes of these anesthetics.

NEUROTRANSMITTER-GATED ion channels, such as  $\gamma$ -aminobutyric acid type A (GABA<sub>A</sub>), glycine, neuronal nicotinic acetylcholine (nACh), 5-hydroxytryptamine<sub>3</sub> (5-HT<sub>3</sub>), and/or *N*-methyl-D-aspartate (NMDA) receptors, are known to be sensitive to most anesthetics, indicating

that these channels are plausible targets for anesthetics.<sup>1-3</sup> A wide variety of structurally diverse general anesthetics, including inhaled and intravenous anesthetics, enhance GABA<sub>A</sub> receptor function. In addition to the neurotransmitter-gated ion channels, some anesthetics are also known to affect G-protein-coupled receptors, such as muscarinic<sub>1</sub> (M<sub>1</sub>) receptors<sup>4</sup> and G-protein-coupled inwardly rectifying potassium (GIRK) channels.<sup>5</sup> These molecules may account for some clinical aspects of anesthesia by anesthetics and ethanol, including analgesia, amnesia, and sedation.<sup>6-8</sup>

A recent report showed that two alkane anesthetics, cyclopropane and butane, failed to increase agonist affinity for the GABA<sub>A</sub> and Torpedo nACh receptors and that they suppressed the functions of nACh and NMDA receptors.<sup>9</sup> This suggests a spectrum of action that is different from halogenated alkane anesthetics, but effects of cyclopropane and butane on other receptors have not been examined. In this study, we examine other targets that could contribute to anesthesia (immobility) produced by nonhalogenated alkanes.

We tested the effects of nonhalogenated alkane anesthetics on recombinant neurotransmitter-gated ion channels ( $\alpha_1\beta_2\gamma_{2S}$  and  $\alpha_2\beta_1$  GABA<sub>A</sub>,  $\alpha_1$  glycine, NR1/NR2A NMDA, GluR1/GluR2  $\alpha$ -amino-3-hydroxy-5-methyl-4-isoxazole propionic acid [AMPA],  $\alpha_4\beta_2$  neuronal nACh, 5HT<sub>3A</sub>), and G-protein-coupled receptors (M<sub>1</sub>) and ion channels (GIRK1/2) expressed in *Xenopus* oocytes. The subunit compositions of the recombinant receptors were chosen on the basis of the predominance of subunit distribution in the central nervous system (CNS).

In this study, we found that cyclopropane and butane at clinical concentrations moderately enhance the glycine receptors, whereas GABA<sub>A</sub> receptors are insensitive. To elucidate the mechanism underlying the differential effects on two inhibitory receptors, we hypothesized that a difference in the volume of binding cavity for the anesthetics is the determinant of anesthetic modulation. We extended mutational study for glycine and GABA<sub>A</sub> receptors as to a position where anesthetics and ethanol have been proven to interact with both receptors and knew that the difference in the volume cannot account for the difference in sensitivity between the glycine and the GABA<sub>A</sub> receptors. We also discuss which signaling systems might be mediators of immobility by these anesthetics.

\* Research Fellow, § Professor, Waggoner Center for Alcohol and Addiction Research. † Professor, ‡ Assistant Researcher, Department of Anesthesia and Perioperative Care, University of California, San Francisco, California.

Received from the Waggoner Center for Alcohol and Addiction Research and the Institute for Cellular and Molecular Biology, University of Texas at Austin, Austin, Texas. Submitted for publication March 18, 2002. Accepted for publication July 23, 2002. Supported by grant No. GM47818 from the National Institutes of Health, Bethesda, Maryland. Dr. Eger is a paid consultant to Baxter Healthcare Corporation, Liberty Corner, New Jersey.

Address reprint requests to Dr. Harris: Waggoner Center for Alcohol and Addiction Research, University of Texas at Austin, 2500 Speedway MBB 1.124, Austin, Texas 78712-1095. Address electronic mail to: harris@mail.utexas.edu. Individual article reprints may be purchased through the Journal Web site, www.anesthesiology.org.

## Materials and Methods

These studies were approved by the Animal Care and Use Committee of the University of Texas (Austin, Texas).

### *cDNA and crRNA Preparations*

The cDNAs encoding the following receptor subunits were used for nuclear injections: human wild-type  $\alpha_1$  or  $\alpha_1$ (S267C) glycine (subcloned in pCIS2 vector)<sup>10</sup>; wild-type human  $\alpha_1$  (subcloned in pBK-CMV N/B-200 vector);  $\alpha_2$ ,  $\beta_1$ ,  $\gamma_{2S}$ , and  $\alpha_2$  mutants (S270X) (subcloned in pCIS2 vector) and  $\beta_2$  (subcloned in pCDM8 vector) GABA<sub>A</sub><sup>11</sup>; human NR1 and NR2A NMDA (subcloned in pcDNA Amp vector)<sup>12</sup>; and human 5-HT<sub>3A</sub> (subcloned in pBK-CMV N/B-200 vector).<sup>13</sup> The cDNAs of rat GluR1 and GluR2 AMPA receptor subunits (subcloned in pBlue-script SK<sup>-</sup> vector)<sup>14</sup>; the cDNAs of rat  $\alpha_4$  and  $\beta_2$  nACh receptor subunits (subcloned in pSP64 and pSP65 vectors, respectively)<sup>15</sup>; the cDNAs of rat GIRK1<sup>16</sup> and mouse GIRK2<sup>17</sup> (subcloned in pBluescript II KS<sup>-</sup> vector); and the cDNA of rat M<sub>1</sub> receptor (subcloned in pGEM vector)<sup>18</sup> were used for crRNA synthesis. *In vivo* transcripts were prepared using the mCAP Capping Kit (Stratagene, La Jolla, CA).

### *Expression of the Receptors in Oocytes*

Isolation of *Xenopus laevis* oocytes was conducted as described previously.<sup>19</sup> Isolated oocytes were placed in modified Barth's saline (MBS) containing 88 mM NaCl, 1 mM KCl, 2.4 mM NaHCO<sub>3</sub>, 0.82 mM MgSO<sub>4</sub>, 0.91 mM CaCl<sub>2</sub>, 0.33 mM Ca(NO<sub>3</sub>)<sub>2</sub>, and 10 mM N-2-hydroxyethylpiperazine-N'-2-ethanesulfonic acid (HEPES) adjusted to pH 7.5. Single cDNAs or combinations of the cDNAs encoding the following receptor subunits were injected into the animal poles of oocytes by a blind method<sup>20</sup>: the  $\alpha_1$  or  $\alpha_1$ (S267C) glycine receptor subunit cDNA (1 ng/30 nl); the  $\alpha_1$ ,  $\beta_2$ , and  $\gamma_{2S}$  GABA<sub>A</sub> receptor subunits cDNAs (2 ng/30 nl in a 1:1:2 molar ratio); the  $\alpha_2$  (wild-type or mutants) and  $\beta_1$  GABA<sub>A</sub> receptor subunits cDNAs (1.5 ng/30 nl in a 1:1 molar ratio); the NR1 and NR2A NMDA receptor subunits cDNAs (1.5 ng/30 nl in a 1:1 molar ratio); the 5-HT<sub>3A</sub> receptor subunit cDNA (1.5 ng/30 nl). The GluR1 and GluR2 AMPA receptor subunits cRNAs, the  $\alpha_4$  and  $\beta_2$  nACh receptor subunits cRNAs, the GIRK1 and GIRK2 receptor subunits cRNAs (30 ng/30 nl in a 1:1 molar ratio), or M<sub>1</sub> receptor subunit cRNA (30 ng/30 nl) were injected into cytoplasm of oocytes. The injected oocytes were singly placed in Corning cell wells (Corning Glass Works, Corning, NY) containing incubation medium (sterile MBS supplemented with 10 mg/l streptomycin, 100,000 U/l penicillin, 50 mg/l gentamycin, 90 mg/l theophylline, and 220 mg/l pyruvate) and incubated at 15–19°C. One to 4 days after injection, the oocytes were used in electrophysiological recording.<sup>19</sup>

### *Electrophysiological Recording*

Oocytes expressing GABA<sub>A</sub>, glycine, AMPA, or M<sub>1</sub> receptors were placed in a rectangular chamber (~100- $\mu$ l volume) and perfused (2 ml/min) with MBS. Oocytes expressing NMDA receptors were perfused with Ba<sup>2+</sup> Ringer's solution (115 mM NaCl, 2.5 mM KCl, 1.8 mM BaCl<sub>2</sub>, and 10 mM HEPES adjusted to pH7.4) to minimize the effects of secondarily activated Ca<sup>2+</sup>-dependent Cl<sup>-</sup> currents, and oocytes expressing nACh receptors were perfused with Ba<sup>2+</sup> Ringer's solution containing 1  $\mu$ M atropine sulfate. For the 5-HT<sub>3A</sub> receptors, oocytes were perfused with low-Ca<sup>2+</sup> Ringer's solution (115 mM NaCl, 2.5 mM KCl, 0.18 mM CaCl<sub>2</sub>, and 10 mM HEPES adjusted to pH7.4) to decrease inhibitory effect of calcium ion. The animal poles of oocytes were impaled with two glass electrodes (0.5–10  $\Omega$ ) filled with 3 M KCl, and the oocytes were voltage clamped at -70 mV by using a Warner Instruments model OC-752B oocyte clamp (Hamden, CT). Glycine, GABA, kainic acid (for AMPA receptors), or ACh (for M<sub>1</sub> receptor) dissolved in MBS was applied to the oocytes for 20 or 30 s to reach a maximal response. Likewise, L-glutamate plus 10  $\mu$ M glycine (for NMDA receptors) or ACh (for nACh receptor) dissolved in Ba<sup>2+</sup> Ringer's solution was applied to the oocytes for 20 s, and 5-HT in low-Ca<sup>2+</sup> Ringer's solution was applied for 30 s. To study the effects on both wild-type and mutant GABA<sub>A</sub> or glycine receptors, the experiments were performed at EC<sub>5</sub> of agonist (concentrations that produced 5% of the maximal currents produced by 1 mM of glycine or GABA). To study the effects on the NMDA, AMPA, nACh, M<sub>1</sub>, or 5-HT<sub>3A</sub> receptors, the experiments were performed at the half-maximal effective concentration (EC<sub>50</sub>) of agonists. Based on the concentration–response relation from our previous work,<sup>4,21,22</sup> which was performed under the same conditions as the current study (receptor: EC<sub>50</sub>, Hill coefficient;  $\alpha_1$  glycine: 206  $\pm$  18  $\mu$ M, 2.1  $\pm$  0.1;  $\alpha_1\beta_2\gamma_{2S}$  GABA<sub>A</sub>: 94  $\pm$  3  $\mu$ M, 1.2  $\pm$  0.04; NR1/NR2A: 2.1  $\pm$  0.3  $\mu$ M, 1.3  $\pm$  0.1; GluR1/GluR2: 91  $\pm$  4  $\mu$ M, 1.4  $\pm$  0.1; 5-HT<sub>3A</sub>: 1.8  $\pm$  0.2  $\mu$ M, 2.1  $\pm$  0.1;  $\alpha_4\beta_2$  nACh: 60  $\pm$  3  $\mu$ M, 0.9  $\pm$  0.1; M<sub>1</sub> ACh: 0.9  $\mu$ M, 1.1), we used agonist concentrations to obtain EC<sub>5</sub> or EC<sub>50</sub> for each receptor as follows: 30–60  $\mu$ M glycine for wild-type  $\alpha_1$  and  $\alpha_1$ (S267C) glycine receptors, 10–30  $\mu$ M GABA for  $\alpha_1\beta_2\gamma_{2S}$  GABA<sub>A</sub>, and 1–2  $\mu$ M GABA for  $\alpha_2\beta_1$  GABA<sub>A</sub> receptors; 60  $\mu$ M ACh for nACh receptors; 1.5–2  $\mu$ M 5-HT for 5-HT<sub>3A</sub> receptors; 2–3  $\mu$ M L-glutamate plus 10  $\mu$ M glycine for NMDA receptors; 100  $\mu$ M kainic acid for AMPA receptors; and 1  $\mu$ M ACh for M<sub>1</sub> receptors. To obtain a control response, the agonists were repeatedly applied until a consistent response was observed. A 5- to 20-min washout period was allowed between drug applications.

Each solution (20 ml) in a closed vial was bubbled with 100% cyclopropane or butane for at least 10 min at room temperature to obtain a saturated solution. The saturated

solution was pumped into the rectangular chamber *via* a roller pump (ColeParmer Instrument Co., Chicago, IL) through 18-gauge polyethylene tubing. The concentrations of cyclopropane and butane in the chamber were quantified by gas chromatography, and the values were  $0.46 \pm 0.03$  atm ( $n = 3$ ) and  $0.29 \pm 0.01$  atm ( $n = 3$ ), respectively. These concentrations correspond to 5 minimum alveolar concentration (MAC) of cyclopropane<sup>23</sup> and 1 MAC of butane.<sup>24</sup> To test the effects of 1 and 2 MAC of cyclopropane, the saturated solutions were diluted with cyclopropane-free solution immediately before application. Cyclopropane or butane was preapplied for 1 min before being coapplied with agonists, unless specified. Effects of anesthetics were expressed as the fraction of control responses, which were calculated by averaging the control responses before and after application of anesthetics. To rule out the involvement of hypoxia, the effect of a perfusion solution bubbled with 100% nitrogen was evaluated in a previous study; replacement of oxygen by nitrogen did not alter the function of several ligand-gated ion channels.<sup>21</sup>

To address the mechanism of cyclopropane action on the  $\alpha_1$  glycine receptor, we examined the glycine concentration–response relation in the presence or absence of cyclopropane, butane, or isoflurane. For other receptors, such as nACh, NMDA, and 5-HT<sub>3A</sub>, we examined the effects of 5 MAC cyclopropane on the maximal response to agonists. According to the concentration–response relations obtained from our previous work,<sup>21,22</sup> 1 mM ACh, 100  $\mu$ M L-glutamate plus 10  $\mu$ M glycine, or 30  $\mu$ M 5-HT were applied to obtain maximal responses.

Experiments with the GIRK1/2 channels were performed with a high potassium (hK) solution containing 2 mM NaCl, 96 mM KCl, 1 mM MgCl<sub>2</sub>, 1.5 mM CaCl<sub>2</sub>, and 5 mM HEPES adjusted to pH 7.5. Initially, oocytes expressing GIRK1/2 were bathed in MBS and changed in hK solution. Because basal current obtained in physiologic buffer (MBS) is small, hK solution was used to reverse the driving force of the channel and provide a large inward current, as reported previously.<sup>5</sup> After stable responses were established, the anesthetics were applied in the hK solution for 2 min before returning to the anesthetic-free hK solution. Effect of the anesthetics was expressed as the fraction of hK responses. All experiments were performed at room temperature (23°C).

#### Mutational Studies on GABA<sub>A</sub> and Glycine Receptors

Our previous studies showed that serine at position 267 located between transmembrane domains 2 and 3 of the glycine  $\alpha_1$  subunit and the corresponding amino acids of GABA<sub>A</sub>  $\alpha$  and  $\beta$  subunits are critical for the positive modulation of the receptor functions by several anesthetics and ethanol.<sup>25–27</sup> Accordingly, we tested the effect of cyclopropane on the homomeric  $\alpha_1$ (S267C) mutant glycine receptor in which serine at position 267

is substituted with cysteine. Also, we studied effects of cyclopropane on  $\alpha_2$  mutant GABA<sub>A</sub> receptors in which the corresponding S270 was substituted with amino acids with larger volume of the side chain, *i.e.*, isoleucine (S270I), asparagine (S270N), threonine (S270T), tyrosine (S270Y), and tryptophan (S270W). The mutated glycine  $\alpha_1$ (S267C) subunit and GABA<sub>A</sub>  $\alpha_2$ (S270X) subunits were constructed by the method of site-directed mutagenesis as described previously.<sup>28</sup> The glycine  $\alpha_1$ (S267C) subunit and GABA<sub>A</sub>  $\alpha_2$ (S270X) subunit were confirmed by DNA sequencing.

#### Animal and Chemicals

*Xenopus laevis* female frogs were purchased from Xenopus Express (Homosassa, FL). Cyclopropane, butane, glycine, L-glutamate, kainic acid, acetylcholine chloride, and 5-hydroxytryptamine hydrochloride were obtained from Sigma Aldrich (St. Louis, MO). GABA was obtained from Research Biochemical International (Natick, MA).

#### Statistical Analysis

Data are represented as mean  $\pm$  SEM. Statistical analysis was performed by one-way analysis of variance for multiple comparisons and unpaired Student *t* test for comparisons between two groups. Differences were considered as statistically significant at a *P* value less than 0.05. The values of the EC<sub>50</sub> and the Hill coefficient were calculated by nonlinear regression using GraphPad Prism software version 3.0 (GraphPad Inc., San Diego, CA). Concentration–response data for glycine were fitted to the equation

$$I/I_{\max} = 1/[1 + (EC_{50}/A)^n],$$

where *I* represents the current, *I*<sub>max</sub> represents the maximal current, *A* represents the agonist (glycine) concentration, and *n* represents the Hill coefficient. Molecular volumes of anesthetics and side chain of amino acid were calculated with Spartan 5.0 software (Wavefunction Inc., San Diego, CA).

## Results

#### Differential Effects of Cyclopropane between GABA<sub>A</sub> and Glycine Receptors

In oocytes expressing GABA<sub>A</sub> or glycine receptors, inward chloride currents were observed in response to the applications of agonists, and effects of anesthetics were studied by coapplication with agonists (fig. 1). For  $\alpha_1\beta_2\gamma_{2S}$  GABA<sub>A</sub> receptors, cyclopropane showed little effect at 1 or 2 MAC (fig. 2A). Even at 5 MAC, it only modestly potentiated the receptor ( $18 \pm 2\%$ ). To test subunit specificity, we also used the  $\alpha_1\beta_2$  GABA<sub>A</sub> receptor and cyclopropane potentiated the  $\alpha_2\beta_1$  GABA<sub>A</sub> receptor to a similar extent as the  $\alpha_1\beta_2\gamma_{2S}$  GABA<sub>A</sub> receptor

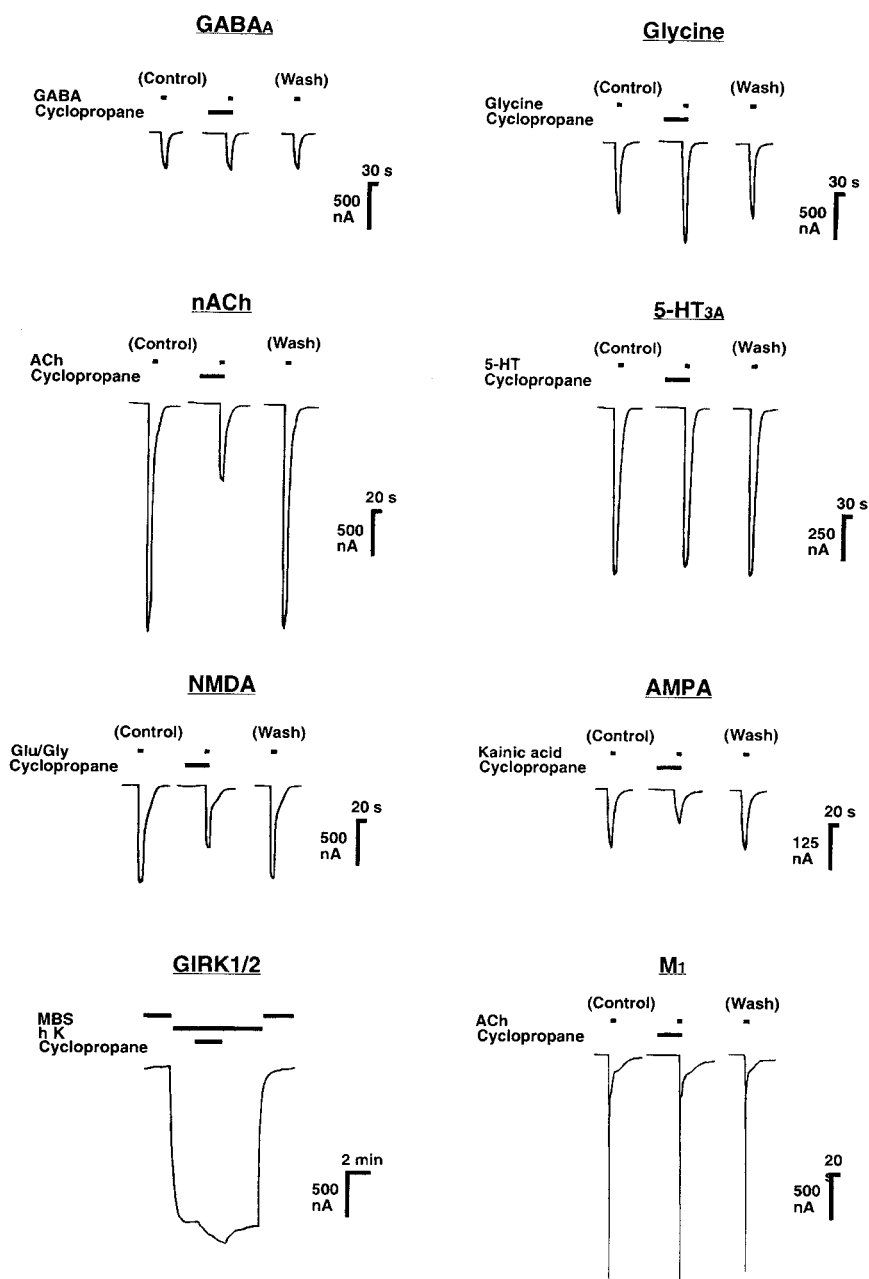

Fig. 1. Representative tracings of the currents of recombinant receptors expressed in *Xenopus* oocytes. Oocytes expressing the receptors were first exposed to the agonists (Control), then 1 minimum alveolar concentration (MAC) of cyclopropane was preapplied for 1 min before being coapplied with agonists followed by 5–20 min of washout period (Wash). Subunit compositions of the recombinant receptors were chosen on the basis of the predominance of subunit distribution in the central nervous system. Bars represent duration of application.

(16%  $\pm$  2%). Thus, it appears that the  $\gamma$  subunit does not influence cyclopropane action on GABA<sub>A</sub> receptors. On the other hand, cyclopropane at 1, 2, and 5 MAC significantly potentiated the current responses of the  $\alpha_1$  glycine receptors by 39, 62, and 161%, respectively. Butane was tested at 1 MAC, which is the highest concentration possible in our system. Butane significantly potentiated the  $\alpha_1\beta_2$  GABA<sub>A</sub> receptors by 13% and  $\alpha_1$  glycine receptors by 64% (fig. 2B). We compared cyclopropane with isoflurane and halothane actions on glycine receptors. Isoflurane at 1, 2, and 5 MAC potentiated the current responses of the  $\alpha_1$  glycine receptors by 101, 209, and 484%, respectively. Similarly, halothane potentiated by 139, 253, and 534% (1, 2, and 5 MAC, respectively).

Isoflurane and halothane seem to be roughly three times more effective than cyclopropane (fig. 3).

Cyclopropane and butane shifted the glycine concentration-response curve leftward as was seen for isoflurane (fig. 4). In the experiments with cyclopropane, nonlinear regression analysis of the concentration response curves yielded the glycine EC<sub>50</sub> value of 118  $\pm$  6  $\mu$ M for control and 69  $\pm$  5  $\mu$ M for cyclopropane ( $P < 0.05$ ), and the Hill coefficients for control and cyclopropane were 2.0 and 2.3, respectively. In the experiments with butane, the glycine EC<sub>50</sub> value of 142  $\pm$  6  $\mu$ M for control and 109  $\pm$  4  $\mu$ M for butane ( $P < 0.05$ ) and the Hill coefficients both for control and for cyclopropane were 1.6. In the experiments with isoflurane, we ob-

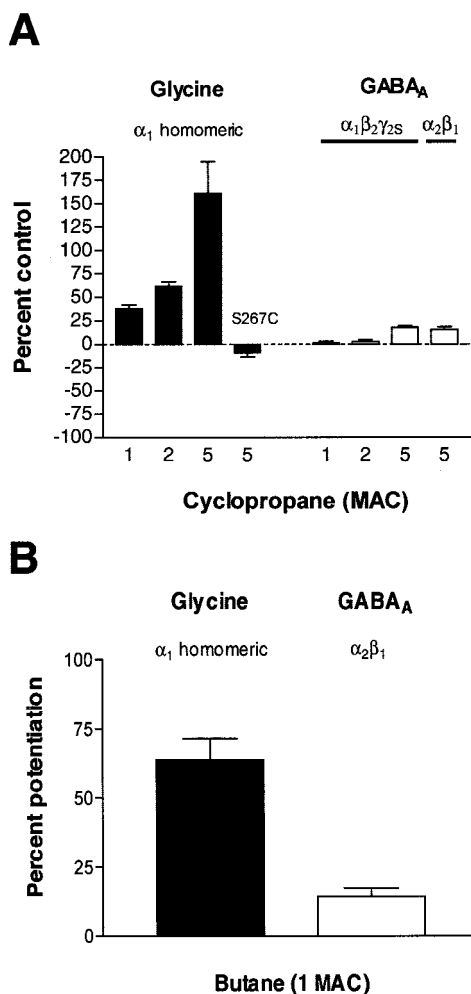

**Fig. 2.** Effects of nonhalogenated alkanes cyclopropane and butane on recombinant GABA<sub>A</sub> and glycine receptors. (A) Cyclopropane (1, 2, and 5 minimum alveolar concentration [MAC]) significantly enhanced the current responses of  $\alpha_1$  glycine receptors to an EC<sub>5</sub> of agonists. On  $\alpha_1$ (S267C) mutant receptor, the enhancing effect of cyclopropane (5 MAC) was completely eliminated. On the other hand, GABA<sub>A</sub> receptors required 5 MAC of cyclopropane for a small, but significant, potentiation. Cyclopropane showed similar effects on  $\alpha_2\beta_1$  GABA<sub>A</sub> receptors. (B) Butane (1 MAC) significantly enhanced the  $\alpha_1$  glycine and the  $\alpha_2\beta_1$  GABA<sub>A</sub> receptors with much higher potentiation of the glycine receptors than the GABA<sub>A</sub> receptors. Error bars represent SEM; n = 6–13 oocytes.

tained a glycine EC<sub>50</sub> value of  $126 \pm 6 \mu\text{M}$  for control and  $31 \pm 8 \mu\text{M}$  for isoflurane ( $P < 0.05$ ), and the Hill coefficients for control and isoflurane were 1.8 and 1.6, respectively. These results suggest that both cyclopropane and butane increase the apparent affinity for glycine as do other volatile anesthetics. The enhancing effect of cyclopropane was completely abolished in the glycine  $\alpha_1$ (S267C) receptor ( $-8\% \pm 4\%$ ; fig. 2A), indicating that cyclopropane interacts with the putative binding pocket composed of serine at position 267 as do ethanol and anesthetics including isoflurane and enflurane.<sup>25–27</sup>

Anesthesiology, V 97, No 6, Dec 2002

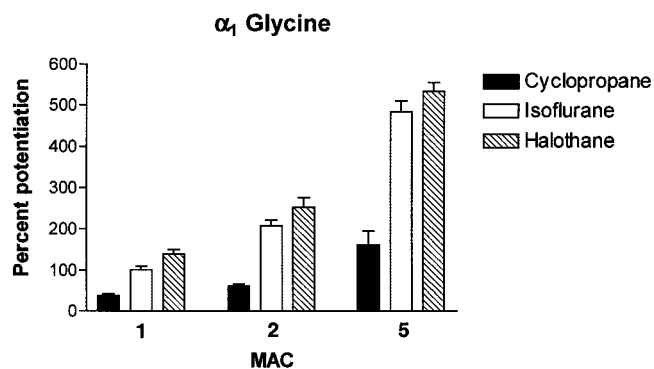

**Fig. 3.** Comparison of enhancing effects of cyclopropane, isoflurane, and halothane on recombinant  $\alpha_1$  glycine receptors. Cyclopropane, isoflurane, and halothane (1, 2, and 5 minimum alveolar concentration [MAC]) significantly enhanced the current responses of the glycine receptors to an EC<sub>5</sub> of glycine. Cyclopropane had roughly two to three times less effect than isoflurane and halothane. Error bars represent SEM; n = 8–13 oocytes.

#### Effects on Other Neurotransmitter-gated and G-protein-coupled Receptors

For the experiments testing the nACh, glutamate, or 5-HT<sub>3A</sub> receptors, oocytes expressing the  $\alpha_4\beta_2$  nACh, NR1/NR2A NMDA, GluR1/GluR2 AMPA, or 5-HT<sub>3A</sub> receptors represented inward cation currents in response to agonists (fig. 1). Cyclopropane inhibited the nACh receptor in a concentration-dependent manner (fig. 5A). One MAC cyclopropane markedly suppressed the nACh receptor function by  $70 \pm 4\%$ . Similarly, cyclopropane concentration-dependently inhibited the NMDA and AMPA glutamate receptors. These receptors were significantly inhibited by 1 MAC cyclopropane (NMDA,  $-29 \pm 5\%$ ; AMPA,  $-51 \pm 5\%$ ). The 5-HT<sub>3A</sub> receptors were less sensitive than the nACh and glutamate receptors and slightly suppressed by 2 MAC. At concentrations of agonists that produce maximal responses (EC<sub>100</sub>), the inhibitory effect of 5 MAC cyclopropane on the 5-HT<sub>3A</sub> receptors was not changed (EC<sub>50</sub>,  $23 \pm 4\%$ ; EC<sub>100</sub>,  $17 \pm 4\%$ ). On the other hand, the inhibitory effects of cyclopropane on the NMDA and the nACh receptors were decreased at agonist EC<sub>100</sub> (NMDA, 5 MAC: EC<sub>50</sub>,  $-66 \pm 4\%$ ; EC<sub>100</sub>,  $-33 \pm 3\%$ ; nACh, 1 MAC: EC<sub>50</sub>,  $-70 \pm 1\%$ ; EC<sub>100</sub>,  $-54 \pm 3\%$ ). Cyclopropane enhanced the function of the GIRK1/2 channels (fig. 5A). One MAC cyclopropane slightly but significantly increased potassium current by  $9 \pm 1\%$ . *Xenopus* oocyte expression system is also well characterized for the study of G-protein-coupled receptors. Activation of M<sub>1</sub> receptors expressed in oocytes results in activation of phospholipase C, mobilization of calcium stores, and activation of an endogenous Ca<sup>2+</sup>-dependent Cl<sup>-</sup> current. Thus, inward currents are observed in response to ACh.<sup>4</sup> Cyclopropane had little effect on the M<sub>1</sub> receptors even at 5 MAC ( $-5\% \pm 4\%$ ; fig. 5A).

Of interest, 1 MAC butane provided similar effects to those of 1 MAC cyclopropane on the most of the recep-

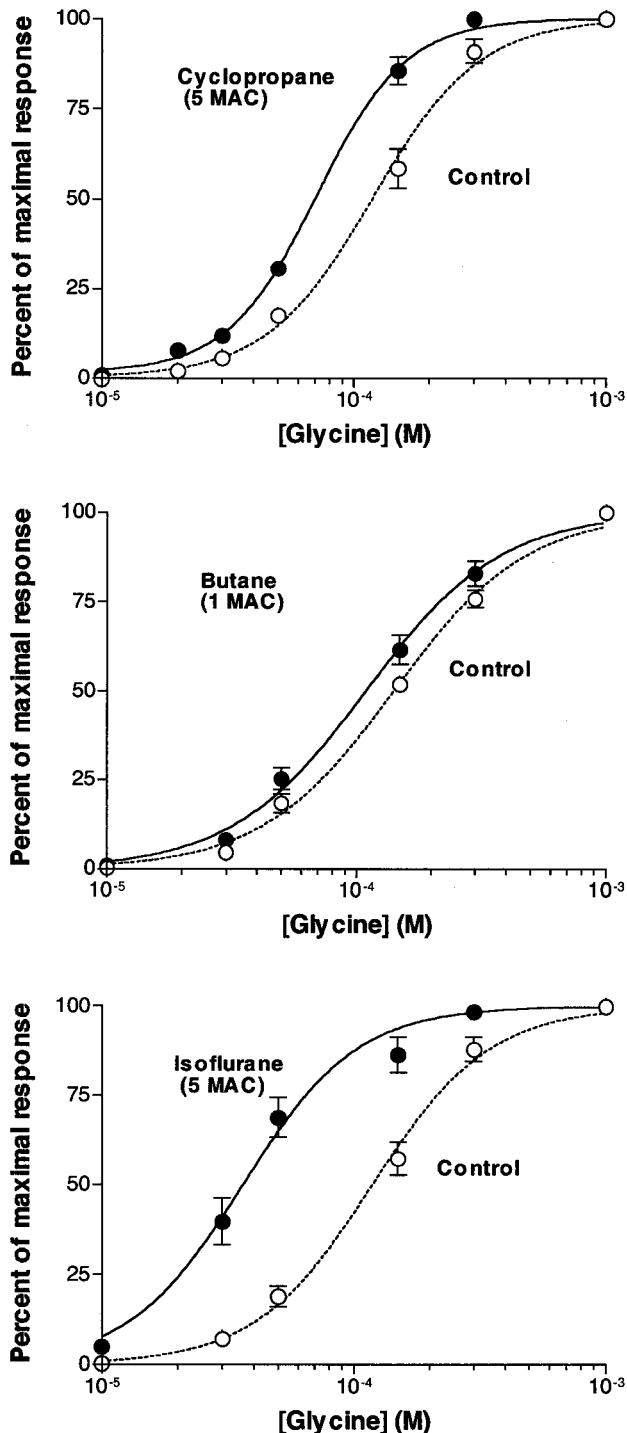

Fig. 4. Effects of anesthetics on agonist concentration–response relation for  $\alpha_1$  glycine receptors. Cyclopropane (5 minimum alveolar concentration [MAC]), isoflurane (5 MAC), and butane (1 MAC) significantly shifted leftward glycine concentration–response curves, indicating an increase in an apparent affinity of agonist (glycine). (Top) Glycine  $EC_{50}$  values were 118  $\mu$ M for control and 69  $\mu$ M for cyclopropane ( $P < 0.05$ ), and Hill coefficients were 2.0 for control and 2.3 for cyclopropane ( $n = 6$ ). (Middle) Glycine  $EC_{50}$  values were 142  $\mu$ M for control and 109  $\mu$ M for butane ( $P < 0.05$ ), and Hill coefficients were 1.6 for control and 1.6 for butane ( $n = 8$ ). (Bottom) Glycine  $EC_{50}$  values were 126  $\mu$ M for control and 31  $\mu$ M for isoflurane ( $P < 0.05$ ), and Hill coefficients were 1.8 for control and 1.6 for isoflurane ( $n = 5$ ). Error bars represent SEM.

tors studied (nACh receptors,  $-72\% \pm 4\%$ ; 5-HT<sub>3A</sub> receptors,  $-3\% \pm 2\%$ ; NMDA receptors,  $-30\% \pm 6\%$ ; GIRK1/2 channels,  $7\% \pm 1\%$ ; M<sub>1</sub> receptors,  $2\% \pm 3\%$ ; fig. 5B). In contrast, butane had little effect on the AMPA receptors ( $-2\% \pm 3\%$ ).

#### Effects of Cyclopropane on GABA<sub>A</sub> Mutant Receptors

To test the idea that the small size of cyclopropane precludes its binding to serine 270 in GABA  $\alpha_2$  subunit, we tested five  $\alpha_2$  mutant GABA<sub>A</sub> receptors coexpressed with  $\beta_1$  subunit with increasing volumes of amino acids at position 270.  $EC_{50}$  values were determined for each of the GABA<sub>A</sub> mutant receptors, which were 0.2–0.5  $\mu$ M for  $\alpha_2(S270T)\beta_1$ , 0.4–0.8  $\mu$ M for  $\alpha_2(S270N)\beta_1$ , 0.5–0.8  $\mu$ M for  $\alpha_2(S270D)\beta_1$ , 0.3–0.7  $\mu$ M for  $\alpha_2(S270Y)\beta_1$ , and 0.02–0.075  $\mu$ M for  $\alpha_2(S270W)\beta_1$  receptor. Cyclopropane (5 MAC) enhanced four of five mutants to a similar extent as  $\alpha_2\beta_1$  wild type, and did not affect  $\alpha_2(S270W)\beta_1$  receptors (fig. 6).

Neither cyclopropane (1–5 MAC) nor butane (1 MAC) produced current in any receptor studied (in the absence of neurotransmitter). Isoflurane as well as halothane (up to 5 MAC) had no effect on basal current of the glycine receptors.

#### Discussion

In this study, we found marked difference in the effects of nonhalogenated alkane anesthetics between GABA<sub>A</sub> and glycine receptors, *i.e.*, they enhanced glycine receptors but not GABA<sub>A</sub> receptors at clinical concentrations. The lack of the effect on GABA<sub>A</sub> receptors is consistent with a previous report.<sup>9</sup> It has been shown that most volatile anesthetics markedly enhance both GABA<sub>A</sub> and glycine receptors,<sup>29–31</sup> although some anesthetics, such as pentobarbital, propofol, and etomidate, are more effective on GABA<sub>A</sub> receptors than glycine receptors.<sup>29,32,33</sup> Neither GABA<sub>A</sub> receptors nor glycine receptors are affected by anesthetics such as ketamine.<sup>34</sup> In this context, nonhalogenated alkane anesthetics cyclopropane and butane belong to a distinct category. This result leads to the question of the mechanism underlying the differential effects of these anesthetics on GABA<sub>A</sub> and glycine receptors. Our results with glycine  $\alpha_1(S267C)$  receptors suggest that cyclopropane interacts with the putative anesthetic and ethanol binding pocket composed of serine 267.<sup>25–27</sup> A small change of volume from serine (volume of the residue: 53  $\text{\AA}^3$ ) to cysteine (65  $\text{\AA}^3$ ) abolished the potentiation by cyclopropane. The molecular volume of cyclopropane and butane are 70 and 99  $\text{\AA}^3$ , respectively, and are relatively small compounds compared to other representative anesthetics, such as isoflurane (144  $\text{\AA}^3$ ) and halothane (110  $\text{\AA}^3$ ). We hypothesized that the volume of the putative binding

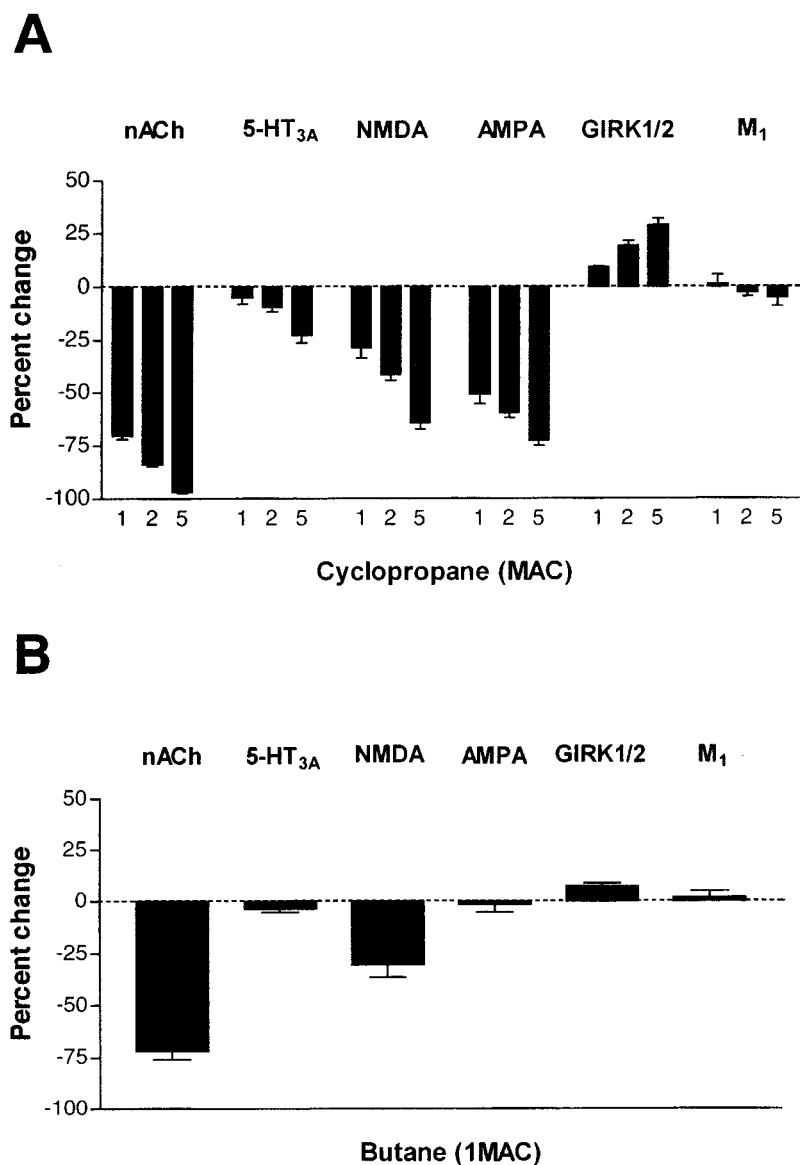

Fig. 5. Effects of nonhalogenated alkanes on recombinant receptors, including  $\alpha_4\beta_2$  nicotinic acetylcholine (nACh), 5-hydroxytryptamine<sub>3A</sub> (5-HT<sub>3A</sub>), NR1/NR2A *N*-methyl-D-aspartate (NMDA), GluR1/GluR2  $\alpha$ -amino-3-hydroxy-5-methyl-4-isoxazole propionic acid (AMPA), muscarinic<sub>1</sub> (M<sub>1</sub>) receptors, and G-protein-coupled inwardly rectifying potassium (GIRK1/2) channels. Cyclopropane (A) at 1, 2, and 5 minimum alveolar concentration (MAC) and butane (B) at 1 MAC were tested on the oocytes expressing receptors. Equipotent concentration (1 MAC) of cyclopropane and butane provided similar effects on all receptors with an exception of the AMPA receptors. Error bars represent SEM; n = 5–9 oocytes.

pocket of GABA<sub>A</sub> receptor may be larger than that of glycine receptor and that because molecular volumes of cyclopropane and butane are small, they might not be able to interact with GABA<sub>A</sub> receptors as tightly as glycine receptors and may not exert an effect strong enough to cause conformational change on the GABA<sub>A</sub> receptors. This “critical volume” hypothesis for anesthetic actions on GABA<sub>A</sub> receptors is based on the work of Jenkins *et al.*,<sup>35</sup> who proposed that the volume of the binding cavity is 250–370 Å<sup>3</sup>. Therefore, we attempted to augment the enhancing effect of cyclopropane on the GABA<sub>A</sub> receptor by a substitution of serine at position 270 in the  $\alpha_2$  subunit with larger amino acids, including threonine (70 Å<sup>3</sup>), asparagine (71 Å<sup>3</sup>), isoleucine (100 Å<sup>3</sup>), tyrosine (116 Å<sup>3</sup>), and tryptophan (137 Å<sup>3</sup>). Contrary to our hypothesis, increasing the volume of the side chain did not produce significant potentiation. Conversely, the potentiation was switched to inhibition in

the  $\alpha_2$ (S270W) $\beta_1$  receptors. In a previous study,<sup>35</sup> a small anesthetic, chloroform (90 Å<sup>3</sup>), provided much greater enhancement when the volume of amino acid at position 270 was increased by approximately 20–30 Å<sup>3</sup>. Because cyclopropane is 20 Å<sup>3</sup> smaller than chloroform, we predicted that an increase of 40–50 Å<sup>3</sup> would augment the action of cyclopropane. However, we increased the volume of the side chains at position 270 by 17, 18, 47, 63, and 84 Å<sup>3</sup>, with no evidence of enhancement of action. As a result, the small volume of nonhalogenated alkane anesthetics does not appear to be the only determinant of the insensitivity of the GABA<sub>A</sub> receptor. Because the putative binding pockets on the glycine and GABA<sub>A</sub> receptors are supposed to be lined with many different amino acids, the binding environment for cyclopropane may be different between the glycine and GABA<sub>A</sub> receptors. It also should be noted that neither cyclopropane nor butane has a dipole mo-

**Fig. 6.** Effects of cyclopropane (5 minimum alveolar concentration [MAC]) on GABA<sub>A</sub>  $\alpha_2$  subunit mutants receptors co-expressed with  $\beta_1$  subunit. Serine at position 270 in the  $\alpha_2$  subunit was substituted with amino acid with increasing volume of the side chain, *i.e.*, threonine (S270T), asparagine (S270N), isoleucine (S270I), tyrosine (S270Y), and tryptophan (S270W). Except  $\alpha_2$ (S270W) $\beta_1$  receptor, none of the mutant receptors showed any significant difference from the  $\alpha_2\beta_1$  wild-type receptors. Error bars represent SEM; n = 4–10 oocytes.

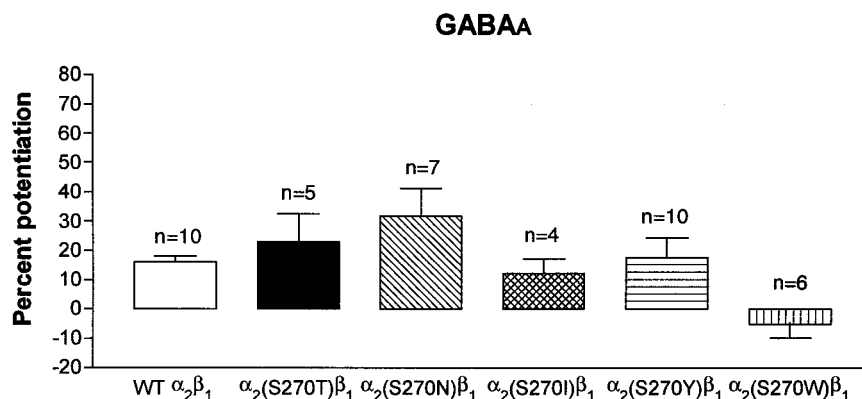

ment. Perhaps polarity is more important for the binding of anesthetics to GABA<sub>A</sub> receptors than glycine receptors.

Our results showed that cyclopropane and butane affect other receptors. These anesthetics inhibited the nACh and NMDA receptors, slightly potentiated the GIRK1/2 channels, and did not change the 5-HT<sub>3A</sub> and M<sub>1</sub> receptors. For the AMPA receptors, only cyclopropane produced a marked inhibition. GABA<sub>A</sub> receptors are thought to be a primary target of anesthetics because most volatile and nonvolatile anesthetics augment the channel activity at clinical concentrations. In terms of the nonhalogenated alkanes cyclopropane and butane, however, this is not the case. Based on sensitivity to clinical concentrations of cyclopropane and butane, glycine, nACh, and NMDA receptors are likely candidates. The nACh receptors are the most sensitive among the receptors tested in this study. Recently, nACh receptors were proposed as targets for anesthetics because volatile anesthetics and some intravenous anesthetics, such as thiopental, inhibit the function of nACh receptors.<sup>36,37</sup> However, nACh receptors appear not to mediate immobility *in vivo*, based on a study using a nACh receptor antagonist.<sup>38</sup> Furthermore, F6 (1,2-dichlorohexafluorocyclobutane), a nonimmobilizer, also inhibits nACh receptors expressed in *Xenopus* oocytes.<sup>39</sup> Thus, the inhibition of nACh receptors is not likely involved in immobility by anesthetics, although their role in other aspects of anesthesia remains to be elucidated.

Glycine receptors are the main inhibitory receptors in the spinal cord and brainstem, and volatile anesthetics enhance the function of these receptors. In this study, the glycine receptors were moderately potentiated by nonhalogenated alkane anesthetics. While the magnitude of the enhancing effect is less than for isoflurane or halothane, glycine receptors are probably target molecules. Indeed, this assumption is supported by *in vivo* study using rats, which demonstrated that MAC of cyclopropane is increased by an intrathecal administration of strychnine, a glycine receptor antagonist.<sup>40</sup>

Glutamate plays a major role in synaptic excitation in the CNS and is critical for information storage in memory

and learning.<sup>41</sup> The NMDA receptors are known to mediate nociceptive neurotransmission in the CNS, and both the NMDA and AMPA receptors are important for memory. Inhibition of NMDA receptors is thought to be responsible for anesthetic actions of ketamine.<sup>42</sup> Cyclopropane and butane moderately inhibited the NMDA receptors. The AMPA receptors were more strongly suppressed by cyclopropane rather than the NMDA receptors. In contrast, butane had little or no effect on the AMPA receptors, suggesting that the suppression of the AMPA receptors is not essential for the anesthesia by nonhalogenated alkane anesthetics. Given a similarity in effects of cyclopropane and butane on most of receptors, except the AMPA receptors, a comparison of behaviors produced *in vivo* between these two anesthetics may elucidate which clinical manifestations can be explained by the AMPA receptors.

It is interesting that nonhalogenated alkane anesthetics potentiate GIRK channels, because volatile anesthetics inhibit the GIRK channels expressed in oocytes.<sup>43</sup> Recently, the GIRK channels were shown to be potentiated by ethanol and to be important for ethanol actions, including analgesia.<sup>5–7</sup> The potentiation by cyclopropane and butane may in part attribute to their analgesic actions. It is, however, unclear whether the GIRK channels are involved in immobility so far.

Previous studies showed that inhalational anesthetics have very similar effects on GABA<sub>A</sub> and glycine receptors and suggested a common site and mechanism of action for these two neurotransmitter-gated ion channels.<sup>3,23</sup> The current work with cyclopropane and butane provides the first evidence that GABA<sub>A</sub> and glycine receptors can be differentially sensitive to some inhalational agents. Our mutation studies suggest a common site between transmembrane domains 2 and 3 that accommodates volatile anesthetics, including cyclopropane, but this site must differ subtly between GABA<sub>A</sub> and glycine receptors.

In summary, our findings suggest that the glycine and NMDA receptors but not GABA<sub>A</sub> receptors may contribute anesthesia (immobility) produced by nonhalogenated alkanes cyclopropane and butane.



The authors thank the laboratories quoted herein for kindly providing cDNAs. The authors also thank James R. Trudell, Ph.D. (Professor, Department of Anesthesia, Stanford University, Palo Alto, California), for calculating molecular volumes.

## References

1. Franks NP, Lieb WR: Molecular and cellular mechanisms of general anesthesia. *Nature* 1994; 367:607-14
2. Krasowski MD, Harrison NL: General anesthetic actions on ligand-gated ion channels. *Cell Mol Life Sci* 1999; 55:1278-303
3. Yamakura T, Bertaccini E, Trudell JR, Harris RA: Anesthetics and ion channels: molecular models and sites of action. *Annu Rev Pharmacol Toxicol* 2001; 41:23-51
4. Minami K, Vanderah TW, Minami M, Harris RA: Inhibitory effects of anesthetics and ethanol on muscarinic receptors expressed in *Xenopus* oocytes. *Eur J Pharmacol* 1997; 339:237-44
5. Lewohl JM, Wilson WR, Mayfield RD, Brozowski SJ, Morrisett RA, Harris RA: G-protein-coupled inwardly rectifying potassium channels are targets of alcohol action. *Nat Neurosci* 1999; 2:1084-90
6. Kobayashi T, Ikeda K, Kojima H, Niki H, Yano R, Yoshioka T, Kumanishi T: Ethanol opens G-protein-activated inwardly rectifying K<sup>+</sup> channels. *Nat Neurosci* 1999; 2:1091-7
7. Blednov YA, Stoffel M, Chang SR, Harris RA: Potassium channels as targets for ethanol: Studies of G-protein-coupled inwardly rectifying potassium channel 2 (GIRK2) null mutant mice. *J Pharmacol Exp Ther* 2001; 298:521-30
8. Durieux ME: Muscarinic signaling in the central nervous system: Recent developments and anesthetic implications. *ANESTHESIOLOGY* 1996; 84:173-89
9. Raines DE, Claycomb RJ, Scheller M, Forman SA: Nonhalogenated alkane anesthetics fail to potentiate agonist actions on two ligand-gated ion channels. *ANESTHESIOLOGY* 2001; 95:470-7
10. Grenningloh G, Schmieden V, Schofield PR, Seeburg PH, Siddique T, Mohandas TK, Becker CM, Betz H: Alpha subunit variants of the human glycine receptor: Primary structures, functional expression and chromosomal localization of the corresponding genes. *EMBO J* 1990; 9:771-6
11. Hadingham KL, Wingrove PB, Wafford KA, Bain C, Kemp JA, Palmer KJ, Wilson AW, Wilcox AS, Sikela JM, Ragan CI, Whiting PJ: Role of the beta subunit in determining the pharmacology of human gamma-aminobutyric acid type A receptors. *Mol Pharmacol* 1993; 44:1211-8
12. Le Bourdelles B, Wafford KA, Kemp JA, Marshall G, Bain C, Wilcox AS, Sikela JM, Whiting PJ: Cloning, functional coexpression, and pharmacological characterization of human cDNAs encoding NMDA receptor NR1 and NR2A subunits. *J Neurochem* 1994; 62:2091-8
13. Maricq AV, Peterson AS, Brake AJ, Myers RM, Julius D: Primary structure and functional expression of the 5HT<sub>3</sub> receptor, a serotonin-gated ion channel. *Science* 1991; 254:432-7
14. Boulter J, Hollmann M, O'Shea-Greenfield A, Hartley M, Deneris E, Maron C, Heinemann S: Molecular cloning and functional expression of glutamate receptor subunit genes. *Science* 1990; 249:1033-7
15. Parker MJ, Beck A, Luetje CW: Neuronal nicotinic receptor beta2 and beta4 subunits confer large differences in agonist binding affinity. *Mol Pharmacol* 1998; 54:1132-9
16. Karschin A, Ho BY, Labarca C, Elroy-Stein O, Moss B, Davidson N, Lester HA: Heterologously expressed serotonin 1A receptors couple to muscarinic K<sup>+</sup> channels in heart. *Proc Natl Acad Sci U S A* 1991; 88:5694-8
17. Lesage F, Duprat F, Fink M, Guillemare E, Coppola T, Lazdunski M, Hugnot JP: Cloning provides evidence for a family of inward rectifier and G-protein coupled K<sup>+</sup> channels in the brain. *FEBS Lett* 1994; 353:37-42
18. Bonner TI, Buckley NJ, Young AC, Brann MR: Identification of a family of muscarinic acetylcholine receptor genes. *Science* 1987; 237:527-32
19. Dildy-Mayfield JE, Harris RA: Comparison of ethanol sensitivity of rat brain kainate, DL-alpha-amino-3-hydroxy-5-methyl-4-isoxalone propionic acid and N-methyl-D-aspartate receptors expressed in *Xenopus* oocytes. *J Pharmacol Exp Ther* 1992; 262:487-94
20. Colman A: Expression of exogenous DNA in *Xenopus* oocytes, Transcription and Translation: A Practical Approach. Edited by Hames BD, Higgins SJ. Washington, DC, Oxford Press, 1984, pp 49-59
21. Yamakura T, Harris RA: Effect of gaseous anesthetics nitrous oxide and xenon on ligand-gated ion channels. *ANESTHESIOLOGY* 2000; 93:1095-101
22. Hara K, Harris RA: The anesthetic mechanism of urethane: The effects on neurotransmitter-gated ion channels. *Anesth Analg* 2002; 94:313-8
23. Saidman IJ, Eger EI II, Munson ES, Babad AA, Muallem M: Minimum alveolar concentrations of methoxyflurane, halothane, ether and cyclopropane in man: Correlation with theories of anesthesia. *ANESTHESIOLOGY* 1967; 28:994-1002
24. Liu J, Laster M, Taheri S, Eger EI II, Chortkoff B, Halsey M: Effect of n-alkane kinetics in rats on potency estimations and the Meyer-Overton hypothesis. *Anesth Analg* 1994; 79:1049-55
25. Mihic SJ, Ye Q, Wick MJ, Koltchine VV, Krasowski MD, Finn SE, Mascia MP, Valenzuela CF, Hanson KK, Greenblatt EP, Harris RA, Harrison NL: Sites of alcohol and volatile anaesthetic action on GABA<sub>A</sub> and glycine receptors. *Nature* 1997; 389:385-9
26. Krasowski MD, Koltchine VV, Rick CE, Ye Q, Finn SE, Harrison NL: Propofol and other intravenous anesthetics have sites of action on the gamma-aminobutyric acid type A receptor distinct from that for isoflurane. *Mol Pharmacol* 1998; 53:530-8
27. Mascia MP, Trudell JR, Harris RA: Specific binding sites for alcohols and anesthetics on ligand-gated ion channels. *Proc Natl Acad Sci U S A* 2000; 97:9305-10
28. Ye Q, Koltchine VV, Mihic SJ, Mascia MP, Wick MJ, Finn SE, Harrison NL, Harris: Enhancement of glycine receptor function by ethanol is inversely correlated with molecular volume at position alpha267. *J Biol Chem* 1998; 273:3314-9
29. Mascia MP, Machu TK, Harris RA: Enhancement of homomeric glycine receptor function by long-chain alcohols and anaesthetics. *Br J Pharmacol* 1996; 119:1331-6
30. Downie DL, Hall AC, Lieb WR, Franks NP: Effects of inhalational general anesthetics on native glycine receptors in rat medullary neurons and recombinant glycine receptors in *Xenopus* oocytes. *Br J Pharmacol* 1996; 118:493-502
31. Jenkins A, Franks NP, Lieb WR: Effects of temperature and volatile anesthetics on GABA<sub>A</sub> receptors. *ANESTHESIOLOGY* 1999; 90:484-91
32. Pistis M, Belelli D, Peters JA, Lambert JJ: The interaction of general anaesthetics with recombinant GABA<sub>A</sub> and glycine receptors expressed in *Xenopus laevis* oocytes: A comparative study. *Br J Pharmacol* 1997; 122:1707-19
33. Sanna E, Mascia MP, Klein RL, Whiting PJ, Biggio G, Harris RA: Actions of the general anesthetic propofol on recombinant human GABA<sub>A</sub> receptors: Influence of receptor subunits. *J Pharmacol Exp Ther* 1995; 274:353-60
34. Yamakura T, Chavez-Noriega LE, Harris RA: Subunit-dependent inhibition of human neuronal nicotinic acetylcholine receptors and other ligand-gated ion channels by dissociative anesthetics ketamine and dizocilpine. *ANESTHESIOLOGY* 2000; 92:1144-53
35. Jenkins A, Greenblatt EP, Faulkner HJ, Bertaccini E, Light A, Lin A, Andreassen A, Viner A, Trudell JR, Harrison NL: Evidence for a common binding cavity for three general anesthetics within the GABA<sub>A</sub> receptor. *J Neurosci* 2001; 21:RC136 (1-4)
36. Violet JM, Downie DL, Nakisa RC, Franks NP, Lieb WR: Differential sensitivities of mammalian neuronal and muscle nicotinic acetylcholine receptors to general anesthetics. *ANESTHESIOLOGY* 1997; 86:866-74
37. Downie DL, Franks NP, Lieb WR: Effects of thiopental and its optical isomers on nicotinic acetylcholine receptors. *ANESTHESIOLOGY* 2000; 93:774-83
38. Eger EI II, Zhang Y, Laster MJ, Flood P, Kendig JJ, Sonner JM: Acetylcholine receptors do not mediate the immobilization produced by inhaled anesthetics. *Anesth Analg* 2002; 94:1500-4
39. Raines DE, Claycomb RJ, Forman SA: Nonhalogenated anesthetics alkanes and perhalogenated nonimmobilizing alkanes inhibit  $\alpha_4\beta_2$  neuronal nicotinic acetylcholine receptors. *Anesth Analg* 2002; 95(3):573-7
40. Zhang Y, Laster MJ, Hara K, Harris RA, Eger EI II, Stabernack CR, Sonner JM: Glycine receptors may mediate part of the immobility produced by inhaled anesthetics. *Anesth Analg* 2003; (in press)
41. Hollmann M, Heinemann S: Cloned glutamate receptors. *Annu Rev Neurosci* 1994; 17:31-108
42. Yamakura T, Mori H, Masaki H, Shimoji K, Mishina M: Different sensitivities of NMDA receptor channel subtypes to non-competitive antagonists. *Neuroreport* 1993; 4:687-90
43. Yamakura T, Lewohl JM, Harris RA: Differential effects of general anesthetics on G protein-coupled inwardly rectifying and other potassium channels. *ANESTHESIOLOGY* 2001; 95:144-53
